# Supplementary material for: Nano-silver functionalized spherical activated carbon with enhanced dipropyl sulfide adsorption capacity and antibacterial properties
Source: Royal Society of Chemistry journal article supplement (doi:10.1039/d2ra00124a), 2022-01-01
Supplement: d2ra00124a1.pdf [file d2ra00124a1.pdf]

## Electronic Supplementary Materials

### Nano-silver functionalized spherical activated carbon with enhanced dipropyl sulfide adsorption capacity and antibacterial properties

Zhilian Yang,<sup>a</sup> Tianhao Zhang,<sup>a</sup> Jiarui Ren,<sup>a</sup> Jiawen Li,<sup>a</sup> Jianlong Ge,<sup>\*a</sup> Haoru Shan,<sup>a</sup> Tao Ji,<sup>a</sup> Mingshen Xu,<sup>a</sup> Qixia Liu<sup>\*a</sup>

a. National & Local Joint Engineering Research Center of Technical Fiber Composites for Safety and Health, School of Textile and Clothing, Nantong University, Nantong 226019, China.

\*Address correspondence to E-mail: Qixia Liu (lqx@ntu.edu.cn); Jianlong Ge (gejianlong@ntu.edu.cn)

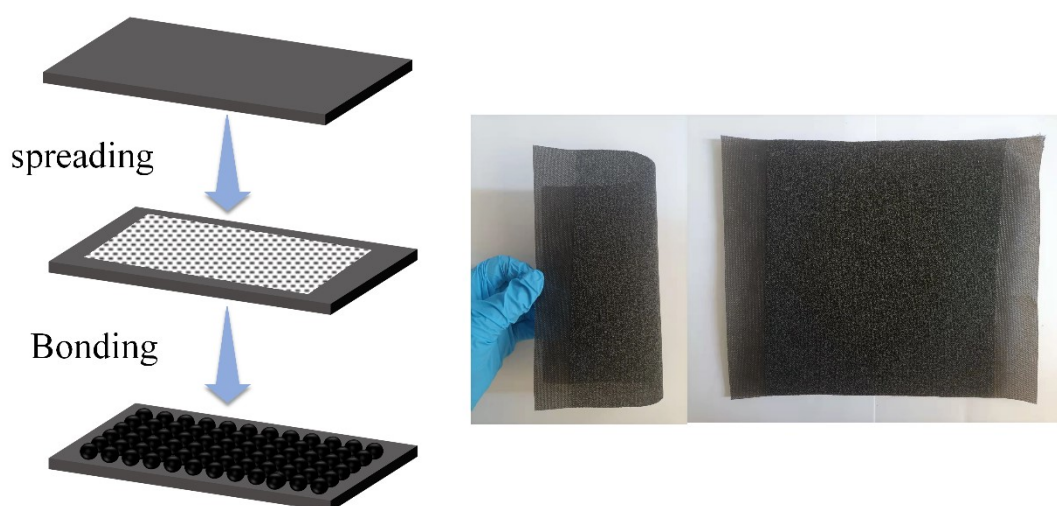

Fig. S1 The preparation process of composite fabric.

**Table S1** EDS elemental analysis of Ag-SAC.

| Elemental (wt %) | C     | O     | Si   | Ag    | Pt   |
|------------------|-------|-------|------|-------|------|
| SAC              | 85.57 | 9.30  | 0.11 | -     | 5.02 |
| 0.05M-Ag-SAC     | 81.93 | 11.65 | 0.06 | 0.51  | 5.85 |
| 0.5M-Ag-SAC      | 76.73 | 11.38 | 0.13 | 5.82  | 5.94 |
| 1M-Ag-SAC        | 68.36 | 12.93 | 0.15 | 12.74 | 5.82 |
